# Supplementary material for: Characterisation of National Immunisation Programmes (NIPs) in the context of Public Health Emergencies (PHEs): A Case Study of 13 Countries in the WHO African Region
Source: Research Square preprint supplement (doi:10.21203/rs.3.rs-135261/v1), 2020-12-29
Supplement: Supplementary file 1 [file 864db9b5437837bd3926d9bf.docx]

**Table 1.** **Total PHE counts stratified by year in 2010, 2014, and 2019**

**Key**

| **Country** | **2010** | **2014** | **2019** |
| --- | --- | --- | --- |
| Angola | 5 | 1 | 4 |
| Burundi | 3 | 2 | 6 |
| Cameroon | 7 | 4 | 6 |
| The Central African Republic | 3 | 10 | 9 |
| Democratic Republic of Congo | 20 | 22 | 36 |
| Ethiopia | 5 | 2 | 11 |
| Guinea | 4 | 4 | 2 |
| Liberia | 2 | 1 | 1 |
| Malawi | 2 | 0 | 3 |
| Niger | 3 | 3 | 7 |
| Sierra Leone | 3 | 2 | 2 |
| South Sudana |  | 8 | 13 |
| Zimbabwe | 6 | 5 | 2 |

|  | Increase in PHE count |
| --- | --- |
|  | Decrease in PHE count |
|  | PHE count constant |
|  | Data unavailable |

a South Sudan gained independence in 2011. As such data for 2010 is unavailable
